# Supplementary material
Source: PubMed Central journal article supplement (PMC5521206)
Supplement: NIHMS877118-supplement-Figure_2.pdf [file NIHMS877118-supplement-Figure_2.pdf]

**Supplementary Figure 2.** REMARK diagram of the 19 patients who had elevated CTC (Group B/C) at baseline that were used to study “CTC-response”.

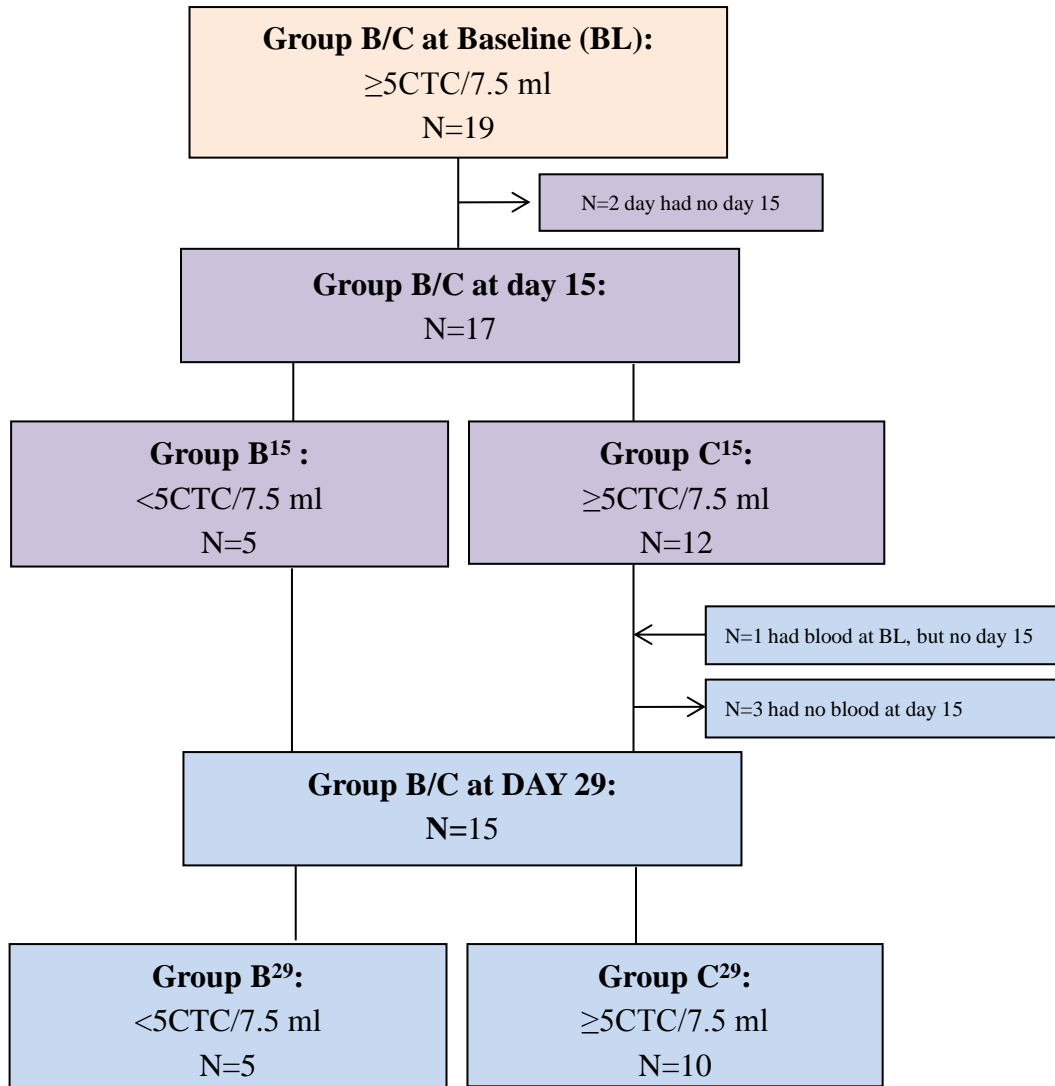

Legend: **Group B/C:**  $\geq 5$ CTC/7.5 ml whole blood at BL; BL=baseline; **B<sup>15</sup>** and **B<sup>29</sup>**: patients that cleared their CTC from  $\geq 5$ CTC/7.5 ml at BL (Group B/C) to  $< 5$ CTC at day 15(**B<sup>15</sup>**) and 29 (**B<sup>29</sup>**), respectively; **C<sup>15</sup>** and **C<sup>29</sup>**: patients that maintained  $\geq 5$ CTC/7.5 ml from BL (Group B/C) to day 15 (**C<sup>15</sup>**) and 29 (**C<sup>29</sup>**), respectively.
