# Supplementary material
Source: PubMed Central journal article supplement (PMC5521206)

**Supplementary Figure 3.** PFS for TIG-treated patients versus the control group according to baseline CTC levels: CTC <5 (S2A) vs.  $\geq 5$  /7.5 ml WB (S2B) (note difference in time scale on y-axis).

**S2A**

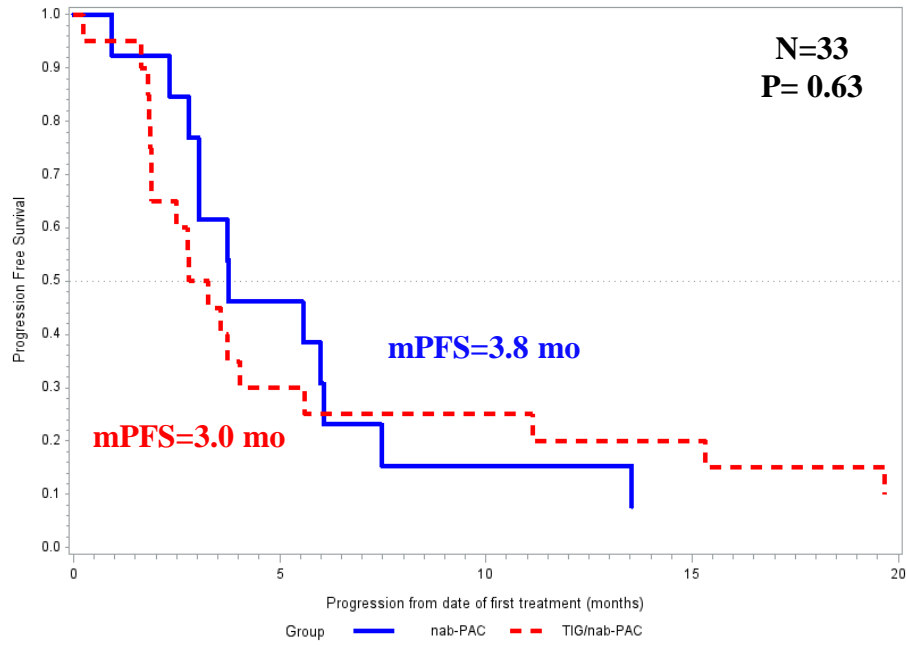

**S2B**

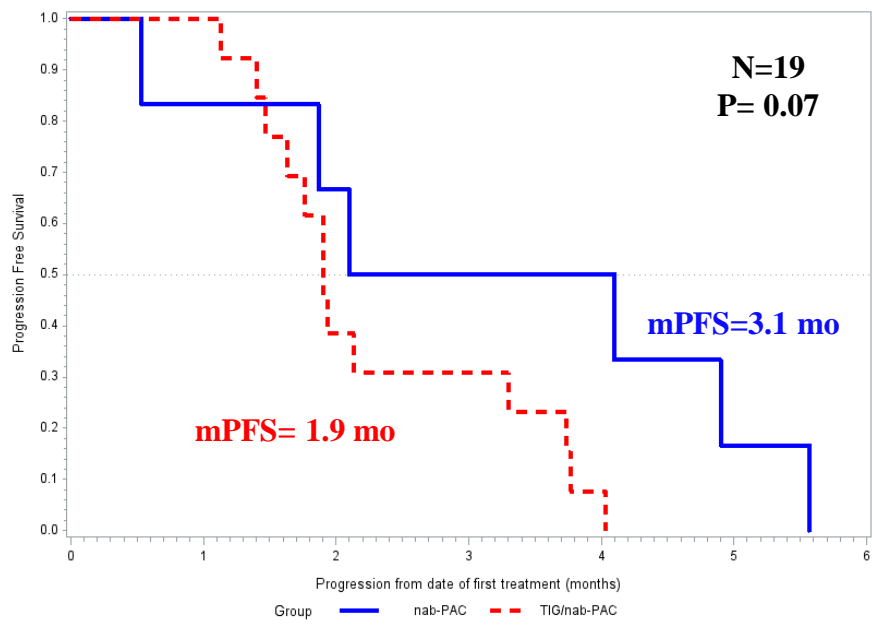

Supplement: NIHMS877118-supplement-Figure_3.pdf [file NIHMS877118-supplement-Figure_3.pdf]
