# Supplementary material
Source: PubMed Central journal article supplement (PMC5521206)

**Supplementary Figure 4.** Association of CTC-response level with RECIST response: ORR and CBR for group B and C as stated above. (Clinical response= either overall response rate (ORR) or clinical benefit response (CBR), as defined in method).

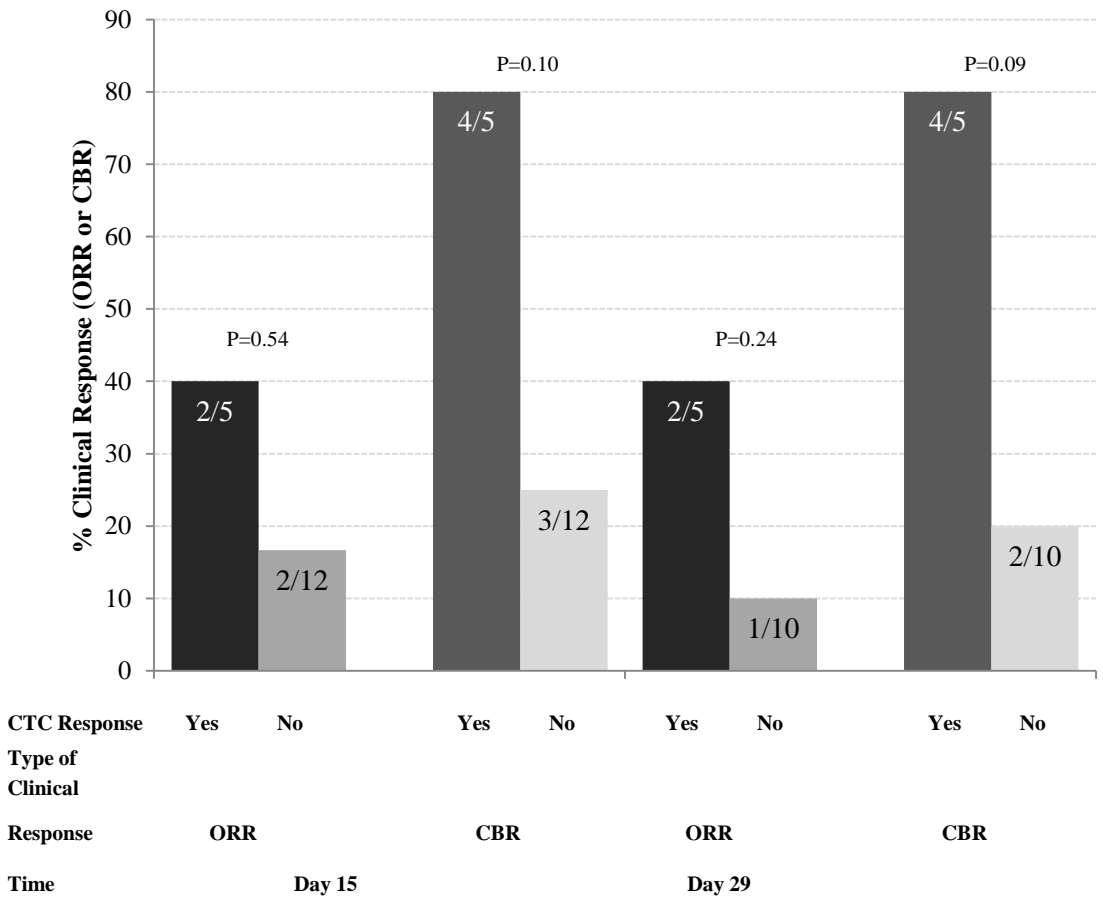

Supplement: NIHMS877118-supplement-Figure_4.pdf [file NIHMS877118-supplement-Figure_4.pdf]
