# Supplementary material
Source: PubMed Central journal article supplement (PMC5521206)

**Supplementary Figure 5.** Association of CTC-apoptosis and response with RECIST response ORR and CBR. (Clinical response= either overall response rate (ORR) or clinical benefit response (CBR), as defined in method).

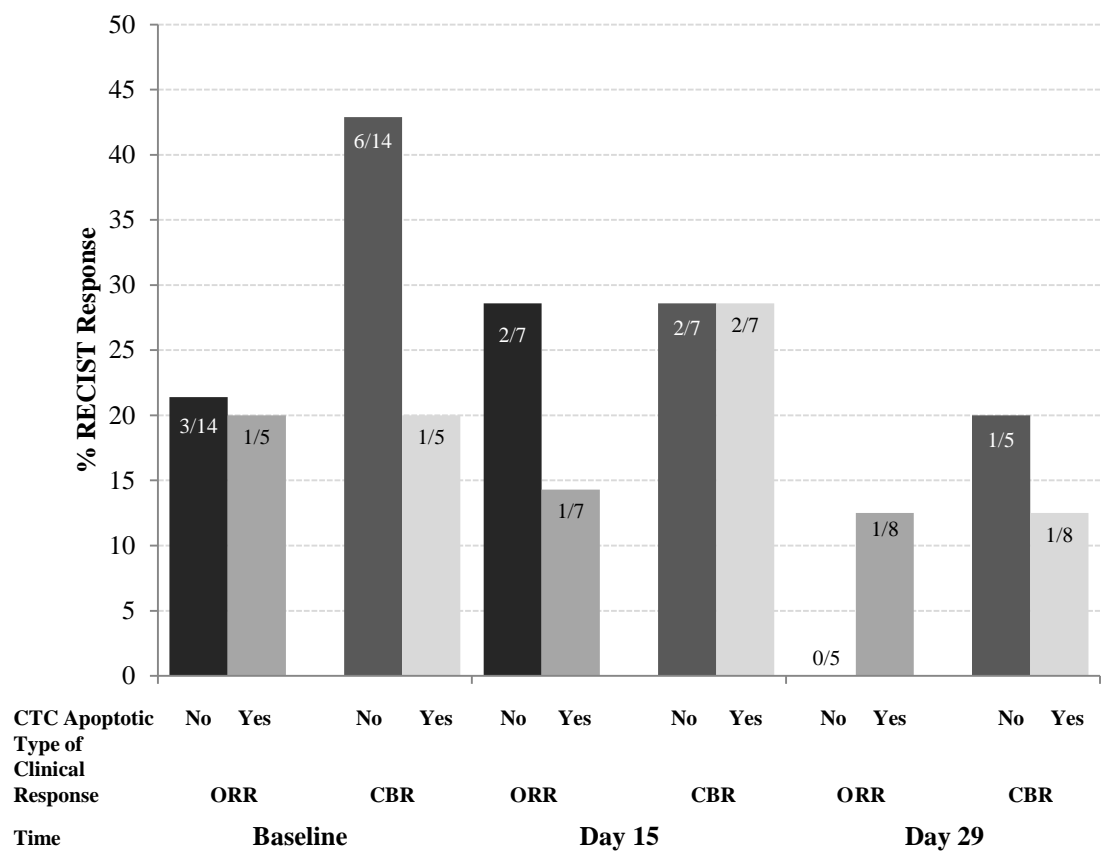

Supplement: NIHMS877118-supplement-Figure_5.pdf [file NIHMS877118-supplement-Figure_5.pdf]
