# Supplementary material
Source: PubMed Central journal article supplement (PMC5521206)
Supplement: NIHMS877118-supplement-Table_1.pdf [file NIHMS877118-supplement-Table_1.pdf]

**Supplementary Table 1.** Table illustrating the criteria with which a cell was considered viable, or apoptotic either due to positive M-30 staining and/or visual evidence of apoptosis (nucleic condensation and/or fragmentation and granular CK).

| Category                     | CTC composite image                                                                 | Relative M-30 staining                                                              | Description                                                                    | CTC Y/N | M-30 positive Y/N | Morphologically apoptotic Y/N |                      |
|------------------------------|-------------------------------------------------------------------------------------|-------------------------------------------------------------------------------------|--------------------------------------------------------------------------------|---------|-------------------|-------------------------------|----------------------|
| Perfect event                | 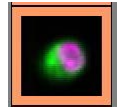   |    | Intact cell satisfying the morphology features                                 | Y       | N                 | N                             | Viable cell          |
|                              |    |    | Intact cell satisfying the morphology features                                 | Y       | Y                 | N                             | Early apoptotic CTC  |
| Apoptotic event due to M-30+ |    |    | Nucleic condensation and/or fragmentation                                      | Y       | Y                 | N/Y                           | Early apoptotic CTC  |
| Apoptotic cells due to M-30+ |    |    | Granular CK                                                                    | Y       | Y                 | N/Y                           | Early apoptotic CTC  |
| Morphologically apoptotic    |    |    | Nucleic condensation and fragmentation                                         | Y       | N                 | Y                             | Late apoptotic event |
| Morphologically apoptotic    |  |  | Granular CK                                                                    | Y       | N                 | Y                             | Late apoptotic event |
| Cell fragments               |  |  | Completely broken cells, but part of the nucleus is still surrounded by the CK | N       | NA                |                               |                      |

Legend: Y= Yes, N= No
