# Supplementary material
Source: PubMed Central journal article supplement (PMC5521206)

**Supplementary Figure 1.** Example of cluster image using the CellSearch<sup>®</sup> system.

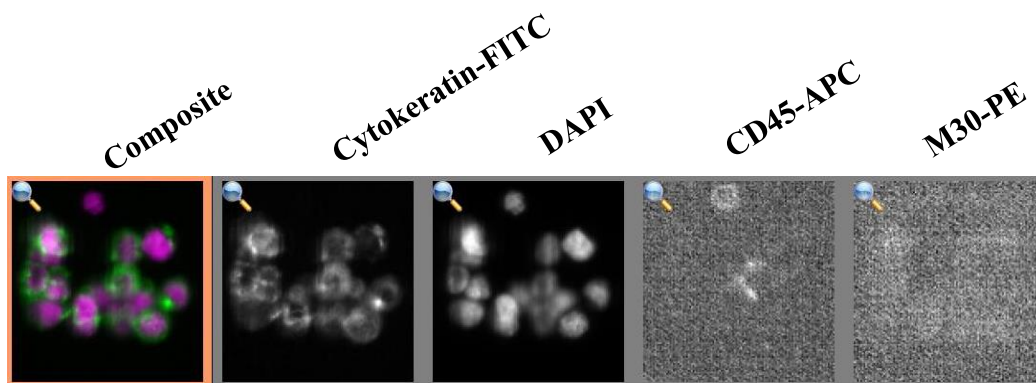

Supplement: NIHMS877118-supplement-Figure_1.pdf [file NIHMS877118-supplement-Figure_1.pdf]
